# 1 ACE2 polymorphisms as potential players in COVID-19 outcome

2 Short title: ACE2 polymorphisms in COVID-19 outcome

3 André Salim Khayat<sup>1,2,\*</sup>, Paulo Pimentel de Assumpção<sup>2</sup>, Bruna Claudia Meireles Khayat<sup>1</sup>, Taíssa  
4 Maíra Thomaz Araújo<sup>2</sup>, Jéssica Almeida Batista-Gomes<sup>1</sup>, Luciana Carvalho Imbiriba<sup>2</sup>, Geraldo  
5 Ishak<sup>2</sup>, Paula Baraúna de Assumpção<sup>2</sup>, Fabiano Cordeiro Moreira<sup>2</sup>, Rommel Rodriguez  
6 Burbano<sup>2,3</sup>, André Ribeiro-dos-Santos<sup>1</sup>, Ândrea Kelly Ribeiro-dos-Santos<sup>1,2</sup>, Ney Pereira  
7 Carneiro dos Santos<sup>1,2</sup>, Sidney Emmanuel Batista dos Santos<sup>1,2</sup>.

8 <sup>1</sup>Instituto de Ciências Biológicas, Universidade Federal do Pará, Belém, Pará, 66075-110, Brazil.

9 <sup>2</sup>Núcleo de Pesquisas em Oncologia, Universidade Federal do Pará, Belém, Pará, 66073-000, Brazil.

10 <sup>3</sup>Laboratório de Biologia Molecular, Hospital Ophir Loyola, Belém, Pará, 66060-281, Brazil.

11 \*Corresponding author (E-mail: [khayatas@gmail.com](mailto:khayatas@gmail.com))

12

## 13 Abstract

14 The clinical condition COVID-19, caused by SARS-CoV-2, was declared a pandemic by the  
15 WHO in March 2020. Currently, there are more than 5 million cases worldwide, and the  
16 pandemic has increased exponentially in many countries, with different incidences and death  
17 rates among regions/ethnicities and, intriguingly, between sexes. In addition to the many factors  
18 that can influence these discrepancies, we suggest a biological aspect, the genetic variation at the  
19 viral S protein receptor in human cells, ACE2 (angiotensin I-converting enzyme 2), which may  
20 contribute to the worse clinical outcome in males and in some regions worldwide. We performed  
21 exomics analysis in native and admixed South American populations, and we also conducted in  
22 silico genomics databank investigations in populations from other continents. Interestingly, at  
23 least ten polymorphisms in coding, noncoding and regulatory sites were found that can shed light  
24 on this issue and offer a plausible biological explanation for these epidemiological differences. In  
25 conclusion, ACE2 polymorphisms should influence epidemiological discrepancies observed  
26 among ancestry and, moreover, between sexes.

## 27 **Introduction**

28           At the end of 2019, a new outbreak caused by SARS-CoV-2 (a coronavirus) started in  
29 Hubei Province, China. The clinical condition, COVID-19, probably arose from natural selection  
30 in bat reservoirs [1]. There are currently more than five million cases worldwide, and the  
31 pandemic has been increasing exponentially in many countries since the disease was deemed a  
32 pandemic by WHO in March 2020 [2].

33           The lethality rate is influenced by the speed of contagion, idiosyncrasies of the affected  
34 populations according to the containment policies adopted, socioeconomic conditions and the  
35 absorption limit of the health system [3]. Due to the high rate of transmission of the virus by air  
36 and the novelty of the infection to humans, the disease has become a global emergency problem,  
37 forcing periods of social confinement to contain the pandemic, in addition to hygiene habits [4].

38           Epidemiological data show a tendency towards slightly greater contamination in men;  
39 however, male mortality is significantly higher [5], representing an increase from 20% to 70% in  
40 European countries, approximately 65% in some Asian countries, and, even more peculiarly,  
41 Dominican Republic citizens showed three times more deaths in men than women [6,2,7], even  
42 considering factors related to behavioral issues. Certainly, there are biological aspects that  
43 contribute to this more adverse clinical condition.

44           Studies indicate that cell–virus interaction is mediated by the connection of the  
45 transmembrane glycoprotein spike (S), present in the form of homotrimers on the viral surface, to  
46 angiotensin I-converting enzyme 2 (ACE2, also called hACE2), which is responsible primarily  
47 for inducing vasodilation [8].

48           The level and expression pattern of ACE2 in different tissues and cells can be critical to  
49 the susceptibility and symptoms resulting from SARS-CoV-2 infection [9]. Zhou and  
50 collaborators [10], using scRNA-seq datasets, classified organs vulnerable to infection as high  
51 and low risk based on their expression levels of ACE2. At the clinical level, the symptoms of  
52 COVID-19 may be related to the entry and affinity of the virus in these organs, as observed in  
53 heart failure disease and increased ACE2 expression, in which viral infection is related to a  
54 higher risk of heart attack and worse ill condition [11]. For Li and collaborators [12], ACE2  
55 genetic variations could be crucial to the susceptibility in different cohorts and to clinical  
56 outcomes of COVID-19.

57           Currently, investigations of potential genetic variations that may favor or hinder  
58 interactions between the virus and the host have been conducted [13,14,15], showing a high  
59 number of codons that can, if altered, interfere with the complexity of the virus–cell interaction.  
60 It is noteworthy that the ACE2 is located on the X chromosome, causing the impossibility of  
61 heterozygosity in men. Therefore, polymorphisms in their single copy could be related to the  
62 worst outcomes observed in males [16].

63           Considering the above, we sought explanations for an intrinsic factor that differed  
64 between sexes and populations that may justify the differences observed in the incidence and  
65 lethality of SARS-CoV-2 infection among the different regions of the world, as well as between  
66 sexes. We analyzed global data in the 1000 Genomes Database and, in addition, we conducted  
67 studies of exomes in two population groups in the Brazilian Amazon (Indians and miscegenated),  
68 without description in public genomic banks, and we compared this information with a public  
69 databank from a population in southeastern Brazil. These comparisons are important because

70 Brazil has a continental size and an admixed population in the North (more Amerindians among  
71 all regions), Northeast (more Africans), and South and Southeast (more Europeans) [17].

## 72 **Materials and Methods**

### 73 **Analyses in the 1000 Genomes Project**

74 The analysis was performed on data from the 1000 Genomes Phase 3 database (1000G),  
75 which comprises 84,4 million variants in 2,504 individuals from 26 different populations [18].  
76 These populations were concentrated in five large groups: African (AFR), Ad Mixed American  
77 (AMR), East Asian (EAS), European (EUR), and South Asian (SAS).

78 Through the complete sequence of the X chromosome, a region between nucleotides  
79 15620281 and 15512643 was selected in revision GRCh37.p13 (15602158 and 15494520 in  
80 GRCh38.p13) since the angiotensin I-converting enzyme 2 gene (ACE2, Gene ID: 59272,  
81 updated on 22-Mar-2020) is located on the complementary strand, covering 107639 bp.  
82 Additionally, a region of ten thousand base pairs upstream to the gene was included in the  
83 analysis so that the initial search site became 15630281 (GRCh37.p13) [18,19], aiming to search  
84 for modifications in noncanonical sites to locate minor allele frequency (MAF) and allelic  
85 differences that could be relevant. The index considered was the difference in allele frequency  
86 among all polymorphisms (SNP, INDEL and SV) contained in the study region, regardless of  
87 their global or populational frequency.

### 88 **Analyses in Amazon Natives and Admixed Population**

89 For the allelic comparison between the populations cataloged in the 1000 Genomes  
90 database and the population not described in the respective project, we investigated a population

91 composed of 64 Amerindians and 82 admixed individuals from the Amazon region of northern  
92 Brazil. This study was approved by the National Committee for Ethics in Research (CONEP) and  
93 the Research Ethics Committee of the UFPA Tropical Medicine Center under CAAE number  
94 20654313.6.0000.5172. The Amerindians represent 10 different Amazonian ethnic groups that  
95 were grouped together as the Native American (NAM) group. Tribe names and geographic  
96 coordinates of the Brazilian Amazon Indian populations are presented in Table S4. The 82  
97 admixed individuals (Brazilian Admixed Population - BAP) live in Belém city, located in  
98 northern Brazil, where, due to the colonization process, are characterized by three ancestral  
99 genetic components: European, Native American and African. This sample group is also enrolled  
100 in a broad project. Furthermore, we also compared our findings to a database of variants analyzed  
101 in a Southeast Brazilian population, the Online Archive of Brazilian Mutations (ABraOM, we  
102 represent here as ABM) [20].

### 103 **DNA Extraction and Exome Library**

104 The DNA was extracted as described by Sambrook and collaborators [21]. The genetic  
105 material was quantified using a Nanodrop spectrophotometer (Thermo Fisher Scientific Inc.,  
106 USA). The libraries were prepared using the Nextera Rapid Capture Exome (Illumina) and  
107 SureSelect Human All Exon V6 (Agilent) Kits. Sequencing reactions were run using the NextSeq  
108 500 High-output v2 300 Cycle Kit (Illumina®, USA) on the NextSeq 500® platform (Illumina®,  
109 USA).

### 110 **Exomic Bioinformatics**

111 The quality of the FASTQ reads was analyzed (FastQC v.0.11-  
112 <http://www.bioinformatics.babraham.ac.uk/projects/fastqc/>), and the samples were filtered to

113 eliminate low-quality readings (fastx\_tools v.0.13 - [http://hannonlab.cshl.edu/fastx\\_toolkit/](http://hannonlab.cshl.edu/fastx_toolkit/)). The  
114 sequences were aligned with the reference genome (GRCh37) using the BWA v.0.7 tool  
115 (<http://bio-bwa.sourceforge.net/>). The file was indexed and sorted (SAMtools v.1.2 -  
116 <http://sourceforge.net/projects/samtools/>). Subsequently, the alignment was processed (duplicate  
117 PCR removal) (Picard Tools v.1.129 - <http://broadinstitute.github.io/picard/>), and mapping  
118 quality recalibration and local realignment (GATK v.3.2 - <https://www.broadinstitute.org/gatk/>)  
119 were performed. The results were processed to determine the variants (GATK v.3.2) from the  
120 reference genome. SnpEff v.4.3t, Ensembl Variant Effect Predictor (Ensembl release 99) and  
121 ClinVar (v.2018-10) were used for variant annotations.

## 122 **Databank Analysis**

123 Information from the databank and exomes were analyzed using descriptive statistics,  
124 considering the values of allele frequencies of populations and subpopulations as the data  
125 explored comparatively. Genotypic differences between sexes in the homo/hemizygous state  
126 were calculated based on the premise that populations are in Hardy-Weinberg equilibrium.

## 127 **Results**

128 Analyzing the polymorphisms contained in the ACE2 locus, in addition to ten thousand  
129 base pairs upstream, we found 2266 polymorphisms, of which 199 were contained in the region  
130 5' upstream of the gene, 85 were located in exonic regions, and the others were located in the  
131 introns.

132 **Polymorphisms in exonic regions that may influence disease outcome**

133 In the exonic region, 15 SNPs of the 85 polymorphisms found in 1000G present  
 134 differences greater than 1% between some of the populations (all between exons 17 to 21).  
 135 Another three polymorphisms (rs889263894, rs1027571965, rs147464721) appear mainly in the  
 136 Brazilian population. Nine of these exonic polymorphisms are present in the most common  
 137 isomorphs (v1 and v2) and show important differences in populational frequency (Fig 1,  
 138 additional data on S1 Table).

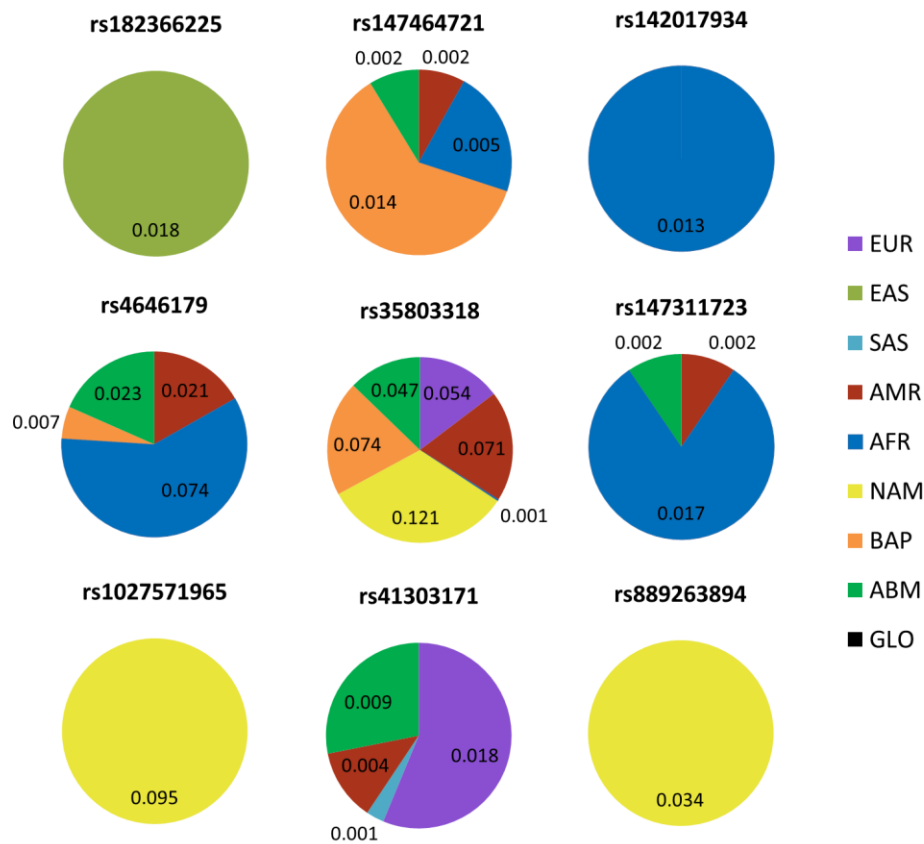

139  
 140 **Fig 1. MAF of the main polymorphisms in exons present in the most common isoforms (v1**  
 141 **and v2) of the ACE2 gene.** RS: Reference SNP; Ref: reference allele; Alt: alternative allele; EUR:  
 142 European; EAS: East Asian; SAS: South Asia; AMR: Ad Mixed American; AFR: African; NAM: Native  
 143 American; BAP: Brazilian Admixed Population; ABM: Online Archive of Brazilian Mutations.

144 As noted, some of these polymorphisms have very significant differences between MAFs  
145 from different populations. rs35803318 is absent in Asians (virtually absent in AFR) and has an  
146 average MAF of 0.05 in EUR and ABM, increased to 0.074 in BAP, and has the highest allele  
147 frequency in the indigenous population among all populations (MAF=0.121).

148 On the other hand, rs4646179 is absent in indigenous, miscegenated people from the  
149 Amazon, Asians and Europeans and is found in the population of southeastern Brazil and  
150 Americans, with a MAF=0.023 and an even greater frequency in Africans (MAF=0.074).

151 Interestingly, rs1027571965 and rs889263894 presented allele frequencies exclusively in  
152 indigenous people and are not being found in any other world population of 1000G, neither in  
153 BAP nor in the Brazilian ABM database, with MAF=0.095 and 0.034, respectively.

154 rs147464721 has MAF=0.014 in the miscegenated population of the Amazon (BAP);  
155 however, they did not present any allelic frequency among the indigenous population, as well as  
156 in Asians and Europeans, presenting a slightly lower MAF difference when compared to AFR  
157 and AMR.

### 158 **Polymorphisms in upstream regions that may influence disease outcome**

159 Differences greater than 1% of MAF in the region 10,000 base pairs 5' upstream to the  
160 gene were observed in 57 polymorphisms (Fig 2).



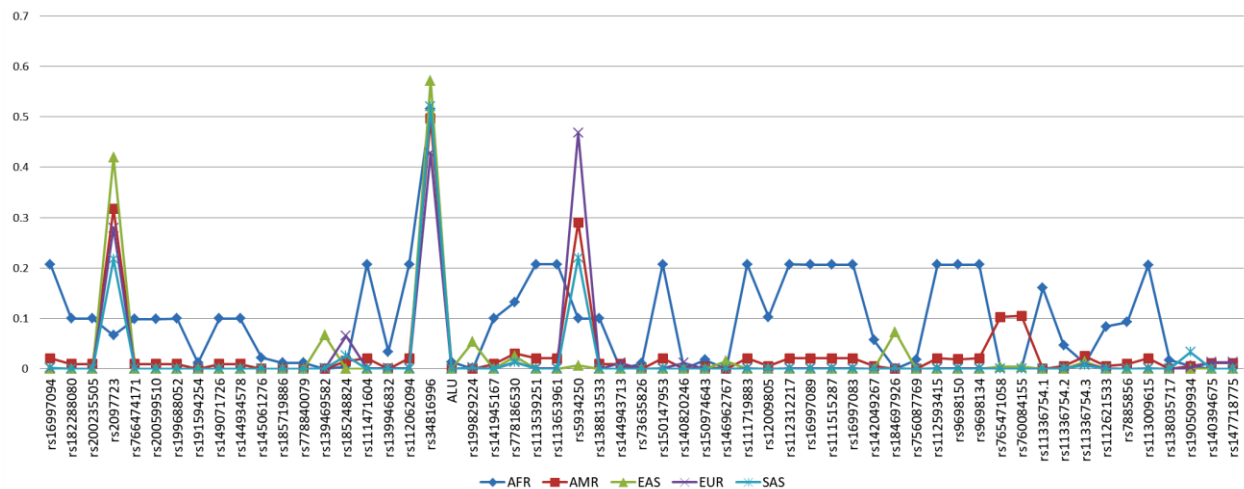

161

162 **Fig 2. MAF of polymorphisms of the 10k 5' upstream region of ACE 2, with MAF**  
163 **differences greater than 1%. Coordinate represents the frequency of the allele (MAF).**

164 Among the highlights, rs5934250, with a change from G to T at approximately 5700 bp  
165 upstream to the gene, presented a difference of up to 0.47 in the AFR (0.10), AMR (0.29), EAS  
166 (0.01), EUR (0.47) and SAS (0.22) populations for the T allele. This means that the T allele is  
167 almost zero in the East Asian population, while it has a MAF in almost half of Europeans.

168 It is also worth mentioning that the rs2097723 SNP presents a very heterogeneous  
169 distribution, oscillating between 7% in Africans, 32% in Americans, 42% in East Asians, 28% in  
170 Europeans and 22% in South Asians.

### 171 **Polymorphisms in intronic regions that may influence disease outcome**

172 In intronic polymorphisms, many of them present a very relevant MAF interpopulational  
173 difference (up to 0.46). Two of them deserve to be highlighted, rs2285666 and rs4646140,  
174 because they are near exons.

175 It is important to mention that rs2285666 has the highest frequency of the rarest allele  
 176 (MAF=0.71) in the indigenous population, with very important MAF differences of 0.17 (EAS),  
 177 0.23 (SAS), 0.36 (BAP), and 0.37 (AMR) and an average difference of 0.48 for the others (EUR,  
 178 AFR and ABM). In contrast, rs4646140 has a MAF ranging from zero in Indians to 0.13 in  
 179 Africans through EUR, AMR, BAP, EAS, ABM and SAS (Fig 3). Furthermore, considering the  
 180 possibility of influence in determining isoforms v2, it is worth noting rs190614788 on intron 1  
 181 (with a difference of more than 0.11 between EUR and EAS).

182 The main findings of our study are concatenated in Table 1 (additional information in S3  
 183 Table), and they are discussed below.

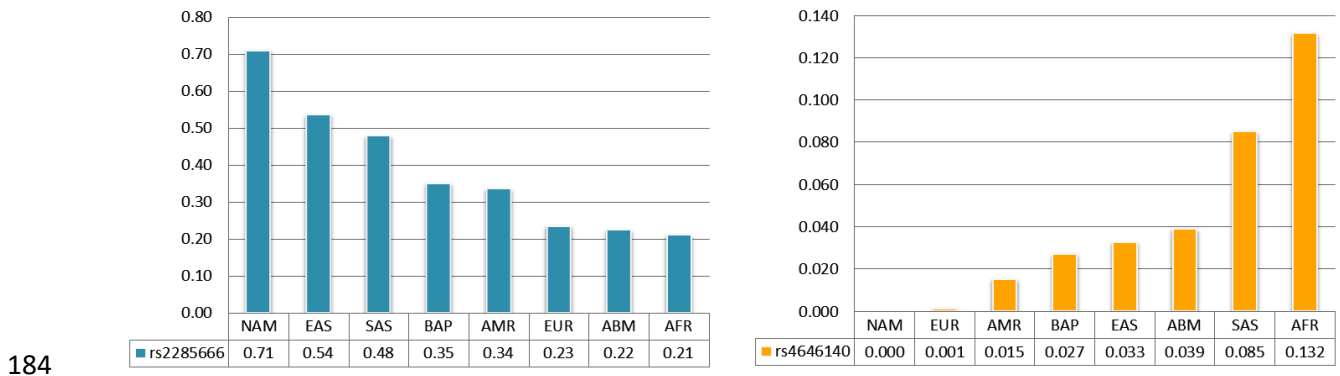

185 **Fig 3. Minor allele frequency of the SNP intronic rs2285666 and rs4646140.**

186 **Table 1. ACE2 polymorphisms with the potential to influence COVID-19 and their**  
 187 **interpopulation and inter-sex differences.**

| Population*   | RS           | Site      | MAF*  | Others (MAF)                 | Modification (score)                                       | Men risk | Women risk | M/W  |
|---------------|--------------|-----------|-------|------------------------------|------------------------------------------------------------|----------|------------|------|
| BAP           | rs147464721  | codon 351 | 0.014 | absent                       | Synonymous                                                 | 1.4%     | 0.0%       | 71.4 |
| ABM, AMR, AFR | rs4646179    | codon 690 | 0.074 | absent                       | Synonymous                                                 | 7.4%     | 0.5%       | 13.5 |
| NAM           | rs35803318   | codon 749 | 0.121 | EAS, SAS, AFR (null)         | Synonymous                                                 | 12.1%    | 1.5%       | 8.3  |
| EUR           | rs41303171   | codon 720 | 0.018 | absent                       | Asn > Asp (0.02)                                           | 1.8%     | 0.0%       | 55.6 |
| AFR           | rs147311723  | codon 731 | 0.017 | EAS, SAS, AMR, ABM (null)    | Leu > Phe (0.941)                                          | 1.7%     | 0.0%       | 58.8 |
| NAM           | rs1027571965 | codon 673 | 0.095 | absent                       | Ala > Gly (0.045)                                          | 9.5%     | 0.9%       | 10.5 |
| NAM           | rs889263894  | codon 541 | 0.034 | absent                       | Lys > Ile (0.958)                                          | 3.4%     | 0.1%       | 29.4 |
| EAS           | rs182366225  | 3'UTR     | 0.018 | absent                       | Upregulation                                               | 1.8%     | 0.0%       | 55.6 |
| AFR           | rs142017934  | 3'UTR     | 0.013 | absent                       | Upregulation                                               | 1.3%     | 0.0%       | 76.9 |
| NAM           | rs2285666    | intron    | 0.71  | EAS (0.54) to AFR (0.17) SAS | Upregulation (Brain, Nerve)                                | 71.0%    | 50.4%      | 1.4  |
| AFR           | rs4646140    | intron    | 0.13  | (0.085) to NAM (0) AMR       | No evidence                                                | 13.0%    | 1.7%       | 7.7  |
| EAS           | rs2097723    | upstream  | 0.42  | (0.32) to AFR (0.07)         | Upregulation (Brain/Nerve)                                 | 42.0%    | 17.6%      | 2.4  |
| EUR           | rs5934250    | upstream  | 0.47  | AMR (0.29) to EAS (0.01)     | Downregulation (Brain, Nerve, Artery, Pituitary, Prostate) | 47.0%    | 22.1%      | 2.1  |

188 Population\*: Population with greater MAF; RS: Reference SNP; Site: genic region; MAF\*: minor allele  
 189 frequency of population\*; Others (MAF): MAF of the other populations (or populations without MAF =  
 190 null); Modification (score): Type of molecular consequence and PolyPhen Score [22]; Men risk: based on  
 191 hemizygous genotypic frequency (q); Women risk: based at homozygous genotypic frequency (q<sup>2</sup>); M/W:  
 192 risk ratio between sexes of being a mutant genotypically.

## 193 **Discussion**

### 194 **Polymorphisms of the ACE2 gene are important in the binding region of the viral particle**

195           Considering the regions where the virus commonly binds to ACE2 [14,15], our results  
196 point to the absence of relevant polymorphisms at these sites because many of those located in  
197 coding regions have MAFs close to or less than 0.001, as well as a very low possibility of  
198 conferring any global (or population) impact on the destination of the disease. Therefore, there  
199 does not seem to be any direct mechanism (at the sites of interaction) that could confer some  
200 form of resistance or greater propensity to contagion in humans. In view of this finding, other  
201 molecular modifications with potential functional repercussions were investigated, including 1)  
202 changes in sites distant to the viral binding locus, but which may bring about some structural  
203 protein change with the potential to influence the cell-virus interaction; 2) changes in translation  
204 regulation regions at 3' UTR sites, at points of interaction with miRNA; and 3) modifications in  
205 transcription regulation zones in 5' upstream regions and intragenic promoters.

### 206 **Polymorphisms with the potential to cause changes in the protein structure of ACE2 that** 207 **may impact virus-cell interactions**

208           The ACE2 gene is mainly composed of two isoforms with 18 or 19 exons (v1 and v2) that  
209 encode the same protein (805 amino acids) and three other smaller variants: x1, x2 and x3, which  
210 have rarely been studied [19,23]. Thus, we searched for genotypic information in these exons that  
211 could allow us to infer a disruption with the potential to culminate in impacts on the disease  
212 process.

213           Fifteen SNPs showed MAF differences greater than 1% among the studied populations,  
214   mainly belonging to exons 17, 18, 19, 20 and 21; the last two are terminal exons belonging only  
215   to rare isoforms [19].

216           Among these, rs41303171 is a missense SNP, causing the replacement of an asparagine  
217   (neutral amino acid) with aspartic acid (electronegative amino acid) at codon 720, which can  
218   culminate in a conformational disorder of this protein that, directly or indirectly, can change viral  
219   interactions. This polymorphic variant C is practically exclusive to Europeans (MAF=0.018), a  
220   fact corroborated by Cao and collaborators [9], mainly in British individuals (MAF=0.03).  
221   Across Asia, this allele is not found, and is only present in a single Asian resident of the UK [18].  
222   In Brazil, ABraOM data point to MAF<0.01. Thus, the possible biological implications of this  
223   change may have some clinical-epidemiological consequences in a small niche of European  
224   patients with COVID-19 when compared to other regions of the world.

225           The change from leucine to phenylalanine in codon 731 (rs147311723) results in the  
226   exchange of two nonpolar amino acids that are structurally different (with the presence of an  
227   aromatic ring in this last), which may culminate in functional modifications in the ACE2 protein,  
228   with the prediction that this will occur equally to 0.941, according to the PolyPhen algorithm  
229   [22]. This polymorphism is absent in Asians and Europeans, with low frequency in Americans  
230   and Southeast Brazilians, and it has MAF=0.017 in Africans, mainly in Nigerians, with  
231   MAF=0.043 of allele A. In a study by Cao and colleagues [9], this polymorphism was described  
232   as a low frequency SNP in the 1000G database, but without any mention in the China Metabolic  
233   Analysis Project (ChinaMAP) database, reinforcing its absence in this population group.

234 In a context focused on the Brazilian Amazon, unprecedented data showed the presence of  
235 two SNPs absent in all populations of the 1000G. One of them is rs1027571965, which is  
236 characterized by an exchange of G>C in exon 16, leading to a substitution of alanine for glycine  
237 at codon 673 (MAF=0.095), and the other, rs889263894, an exchange of T>A in exon 13  
238 (MAF=0.034), causing an alteration of lysine to isoleucine in codon 541; thus, this last SNP  
239 should cause structural differences by the exchange of a polar and electropositive amino acid  
240 with a hydrophobic amino acid, possibly resulting in functional changes in ACE2, with a  
241 probability of 0.958 that this event will occur [22]. Both SNPs had uncertain significance until  
242 now.

243 It is also noteworthy that in codons 351 (rs147464721), 690 (rs4646179) and 749  
244 (rs35803318), there are just synonymous alterations, without any study of modifications of this  
245 enzyme in a genotype-dependent manner.

#### 246 **Polymorphisms with the potential to accentuate ACE2 gene expression or translation that** 247 **may impact virus-cell interactions**

248 Our data point to a series of polymorphisms in the region upstream of the ACE2 gene,  
249 which oscillate markedly among populations and, therefore, in individuals, although some of  
250 them may not have relevant frequency at a global level. Among them, there are rs2097723 and  
251 rs5934250, with population allele differences of up to 0.35 and 0.47, respectively.

252 The lower frequency allele (C) of rs2097723 has a normalized effect size (NES) of up to  
253 0.36 [24] for increased expression of the ACE gene in brain tissue. The T allele of rs5934250 has  
254 an NES of 0.64 for lower ACE2 expression in this tissue, among others. Thus, when looking at  
255 population data, it can be inferred that, according to these two variants, populations in East Asia

256 would have the worst scenario with regard to increased gene expression and, Europeans or  
257 Africans have the most favorable allelic combination for these two SNPs in the pre-genic region.

258 Another interesting observation involves the exon 19 polymorphisms, which are  
259 contained in the 3' UTR region of the two most important isoforms, the canonical miRNA  
260 binding site for translation control dependent on this epigenetic mechanism [19,25]. In this  
261 regard, observing the regions of interaction between the miRNA and nucleotide exchange sites, it  
262 can be noted that rs182366225 is included in the site of attachment to the seed region of miR-  
263 140-3p.1 and miR-483-3p.2, both with a match of 7mer-1A and Context ++ score percentile of 90  
264 and 74, respectively. Thus, the proportion of translation regulation that depends on these  
265 miRNAs will be upregulated in the East Asian population, especially in Vietnamese and Chinese  
266 individuals, who have an average MAF of 0.032 of the C allele, which is not observed in any  
267 other population in the world [26]. A reporter assay for miR-483-3p predicted targets by Kemp  
268 and collaborators [27] showed that the regulation of ACE2 is dependent on this microRNA.

269 The rs142017934 site includes the connection site for miR-610 and miR-3646, both with  
270 8mer of match in ACE2 (context ++ score percentile of 98 and 77, respectively), in addition to  
271 the seed regions of miR-3609 and miR-548ah-5p, both with a match of 7mer-m8 and scores of 84  
272 and 74, respectively [25]. This polymorphism occurs exclusively in the population of African  
273 origin (MAF=0.013), mainly in Nigerians and individuals from Barbados with African ethnicity,  
274 with an average of MAF=0.026. This higher frequency among people of African ethnicity  
275 residing on different continents is probably due to the strong population ancestry of Barbados  
276 being from West Africa, a region containing Nigeria [28].

277           Among the intronic polymorphisms, rs2285666 draws much attention because it presents  
278 the highest frequency of the rarest allele (MAF=0.71) in the indigenous population, with  
279 differences ranging from 0.48 to 0.17 for the other populations, with the Asians being the most  
280 similar to the Indians, mainly the Chinese. The high MAF observed in the Chinese population in  
281 the present study corroborates the data of Cao and collaborators<sup>9</sup> using the ChinaMAP database.  
282 The substitution of C for T in intron 4, to only four nucleotides of exon 3 (located in the splicing  
283 region), influences the gene expression in brain tissues and tibial nerve in some way so that the T  
284 allele is related to a significant increase in the expression of ACE2 [22], thus being a determinant  
285 in clinical differences that will be demonstrated in this naturally more vulnerable population.

286           Another intronic polymorphism, rs4646140, has no MAF in the indigenous population,  
287 reaching 0.13 in Africans, mainly in Nigerians (0.17). Some studies show the influence of these  
288 two intronic SNPs with hypertension [29,30], since there is a possibility that they will interfere in  
289 the ACE2 protein product.

290           In conclusion, considering this genetic aspect involving ACE2 in the complex relationship  
291 between SARS-CoV-2 and humans, we emphasize the following:

292           There are genetic markers that could influence the unequal rates of aggravation and death  
293 observed between men and women. Considering the polymorphisms as harmful when in  
294 homozygosity (genotypic frequency equal to allelic frequency squared) or hemizyosity  
295 (genotypic frequency equal to allelic frequency), men would have this conditions from 1·4 to 77  
296 times more (uniallelic) than women (Table 1). Thus, a relevant contribution to the understanding  
297 of higher mortality in males is presented, as reported in the various populations affected by  
298 COVID-19.



299           The rates of contagion and death fluctuate greatly; in this sense, ACE2 polymorphisms  
300 could contribute to these differences. The rs182366225 and rs2097723 polymorphisms are more  
301 frequent in the East Asian population and are potentially unfavorable to the individual, as they  
302 increase the expression of the enzyme. These allele frequencies are even higher in Chinese and  
303 Vietnamese populations. Such markers are on the order of 30% to 180% more frequently in East  
304 Asians than in other populations.

305           Indigenous populations from Amazon have exclusive genetic polymorphisms  
306 (rs1027571965 and rs889263894) or with higher frequencies (rs2285666 and rs35803318) than  
307 other populations. These polymorphisms are related to increased expression of the ACE2 gene in  
308 brain tissues, among others. This is an extremely relevant finding because they may influence the  
309 outcomes in these populations, whose involvement by COVID-19 was recently reported. This  
310 population group, due to its genetic peculiarity and less previous exposure to viral infections,  
311 represents a major challenge in understanding and handling this pandemic.

312           Africans have higher rates of three relevant polymorphisms (rs147311723, rs142017934  
313 and rs4646140). Polymorphism in rs142017934 is exclusive to this population and can influence  
314 the translation regulation of the ACE2 gene, thus enhancing the expression of this gene, which  
315 may present an increased risk for individuals who carry this variant. However, Europeans and  
316 some Africans have a higher frequency of an allele (rs5934250) that seems to reduce the  
317 expression of ACE2 in some tissues. Individuals with this genotype would have a more  
318 protective factor against this infection.

319           Therefore, the study highlights the importance of this genetic factor in facilitating or  
320 restricting infection and, especially, in potential clinical manifestations and outcomes. The

321 investigation of these polymorphisms in patients affected by COVID-19, with different clinical  
322 conditions and outcomes, has great potential to favor understanding the behavior of this  
323 pandemic disease.

## 324 **Acknowledgments**

325 The authors are grateful to the Federal University of Pará (Propesp), CNPq (National  
326 Council for Scientific and Technological Development) and CAPES for supporting the current  
327 research; to the 1000 Genomes Database and ABraOM for making their data available to  
328 researchers; and to all the people who, with their genetics or dedication, collaborated here to  
329 understand an important aspect of this pandemic.

## 330 **References**

- 331 01. Andersen K, Rambaut A, Lipkin W, Holmes E, Garry R. The proximal origin of SARS-CoV-  
332 2. *Nature Medicine* 2020; 26: 450-452.
- 333 02. WHO. World Health Organization, member, states and regions. (accessed April 2020).  
334 Available from: <https://who.maps.arcgis.com>
- 335 03. Boccia S, Ricciardi, W, Ioannidis, J. What Other Countries Can Learn From Italy During the  
336 COVID-19 Pandemic. *JAMA Inter Med* 2020. (accessed April 2020). Available from:  
337 <https://jamanetwork.com/journals/jamainternalmedicine/fullarticle/2764369>  
338 doi:10.1001/jamainternmed.2020.1447
- 339 04. Wang Y, Wang Y, Chen Y, Qin Q. Unique epidemiological and clinical features of the  
340 emerging 2019 novel coronavirus pneumonia (COVID-19) implicate special control  
341 measures. *J Med Virol* 2020. (accessed March 2020). Available from:  
342 <https://onlinelibrary.wiley.com/doi/full/10.1002/jmv.25748> doi: 10.1002/jmv.25748.
- 343 05. Wenham C, Smith J, Morgan R. On behalf of the Gender and COVID-19 Working Group  
344 COVID-19: the gendered impacts of the outbreak. *The Lancet* 2020; 395 (10227): 846-848.
- 345 06. Chinese Center for Disease Control and Prevention. The epidemiological characteristics of an  
346 outbreak of 2019 novel coronavirus diseases (COVID-19) in China. *Zhonghua Liu Xing  
347 Bing Xue Za Zhi* 2020; 17;41(2):145-151.
- 348 07. GlobalHealth50/50. Global Health 50/50. (accessed April 2020). Available from:  
349 <http://globalhealth5050.org/covid19/>

- 350 08. Kohlstedt K, Shoghi F, Muller-Esterl W, Busse R, Fleming I. CK2 phosphorylates the  
351 angiotensin-converting enzyme and regulates its retention in the endothelial cell plasma  
352 membrane. *Circ. Res* 2002; 91: 749–756.
- 353 09. Cao Y, Li L, Feng Z, et al. Comparative genetic analysis of the novel coronavirus (2019-  
354 nCoV/SARS-CoV-2) receptor ACE2 in different populations. *Cell Discov* 2020; 24: 6:11.
- 355 10. Zhou P, Yang X, Wang X, et al. A pneumonia outbreak associated with a new coronavirus of  
356 probable bat origin. *Nature* 2020; 579: 270–273.
- 357 11. Chen L, Li X, Chen M, Feng Y, Xiong C. The ACE2 expression in human heart indicates  
358 new potential mechanism of heart injury among patients infected with SARS-CoV-2.  
359 *Cardiovasc Res* 2020; Mar 30. pii: cvaa078.
- 360 12. Li Y, Zhou W, Yang L, You R. Physiological and pathological regulation of ACE2, the  
361 SARS-CoV-2 receptor. *Pharmacol Res* 2020; Apr 14:104833.
- 362 13. Othman H, Bouslama Z, Brandenburg J, et al. Interaction of the spike protein RBD from  
363 SARS-CoV-2 with ACE2: similarity with SARS-CoV, hot-spot analysis and effect of the  
364 receptor polymorphism. (accessed March 2020). Available from:  
365 <https://www.biorxiv.org/content/10.1101/2020.03.04.976027v3>  
366 [.doi.org/10.1101/2020.03.04.976027](https://doi.org/10.1101/2020.03.04.976027)
- 367 14. Ortega J, Serrano M, Pujol F, Rangel H.. Role of changes in SARS-coV-2 spike protein in the  
368 interaction with the human ACE2 receptor: an in silico analysis. *EXCLI Journal* 2020; 19:  
369 410-417.
- 370 15. Yan R, Zhang Y, Li Y, Xia L, Guo Y, Zhou Q. Structural basis for the recognition of SARS-  
371 CoV-2 by full-length human ACE2. *Science* 2020; 367 (6485): 1444-1448.
- 372 16. Walls A, Park Y, Tortorici M, Wall A, McGuire A, Velesler D. Structure, Function, and  
373 Antigenicity of the SARS-CoV-2 Spike Glycoprotein. *Cell* 2020; pii, S0092-8674(20)30262-  
374 2.
- 375 17. Santos N, Ribeiro-Rodrigues E, Ribeiro-Dos-Santos A, Pereira R, Gusmão L, Amorim  
376 Guerreiro J, Zago MA, Matte C, Hutz M, Santos S. Assessing individual interethnic  
377 admixture and population substructure using a 48-insertion-deletion (INSEL) ancestry-  
378 informative marker (AIM) panel. *Hum Mutat* 2010; 31(2): 184-90.
- 379 18. IGSR. The International Genome Sample Resource. IGRS. (accessed April 2020). Available  
380 from: <https://www.internationalgenome.org/>
- 381 19. NCBI. ACE2 angiotensin I converting enzyme 2 [Homo sapiens (human)]. PUBMED.  
382 (accessed April 2020). Available from: <https://www.ncbi.nlm.nih.gov/gene/59272>
- 383 20. ABraOM Online Archive of Brazilian Mutations. (accessed April 2020). Available from:  
384 <http://abraom.ib.usp.br/>
- 385 21. Sambrook J, Fritsch E, Maniatis T. Molecular cloning: a laboratory manual. New York: Cold  
386 Spring Harbor Laboratory Press 1989.
- 387 22. Adzhubei I, Jordan D, Sunyaev S. Predicting functional effect of human missense mutations  
388 using PolyPhen-2. *Curr Protoc Hum Genet* 2013; 76: 7.20.1-7.20.41.

- 389 23. Chen J, Jiang Q, Xia X, Liu K, Yu Z, Tao W, Gong Han J. Individual Variation of the SARS-  
390 CoV2 Receptor ACE2 Gene Expression and Regulation. Preprints 2020. (accessed March  
391 2020). Available from: <https://www.preprints.org/manuscript/202003.0191/v1>
- 392 24. GTEx Portal. The Genotype-Tissue Expression (GTEx). GTEx Portal. (accessed March  
393 2020). Available from: <https://www.gtexportal.org/>
- 394 25. Agarwal V, Bell G, Nam J, Bartel D. Predicting effective microRNA target sites in  
395 mammalian mRNAs. *Elife* 2015; 4: e05005.
- 396 26. Cunningham F, Achuthan P, Akanni W, et al. Ensembl 2019. *Nucleic Acids Res* 2019; 47D,  
397 D745–D751.
- 398 27. Kemp J, Unal H, Desnoyer R, Yue H, Bhatnagar A, Karnik S. Angiotensin II-regulated  
399 microRNA 483-3p directly targets multiple components of the renin-angiotensin system. *J*  
400 *Mol Cell Cardiol* 2014; 75, 25-39.
- 401 28. Gouveia M, Borda V, Leal T, et al. Origins, admixture dynamics and homogenization of the  
402 African gene pool in the Americas. *Mol Biol Evol* 2020; pii, msaa033.
- 403 29. Zhao Q, Gu D, Kelly T, et al. Association of Genetic Variants in the Apelin–APJ System and  
404 ACE2 With Blood Pressure Responses to Potassium Supplementation: The GenSalt Study.  
405 *Am J Hypertens* 2010; 23(6), 606–613.
- 406 30. Luo Y, Liu C, Guan T, et al. Association of ACE2 genetic polymorphisms with hypertension-  
407 related target organ damages in south Xinjiang. *Hypertens Res* 2019; 42(5), 681-689.

## 408 **Supporting information**

409 **S1 Table. The minor allele frequency (MAF) of SNPs in exonic regions of ACE2 that**  
410 **showed differences between the investigated populations.** RS: Reference SNP; Ref: reference  
411 allele; Alt: alternative allele; EUR: European; EAS: East Asian; SAS: South Asian; AMR: Ad Mixed  
412 American; AFR: African; NAM: Native American; BAP: Brazilian Admixed Population; ABM: Online  
413 Archive of Brazilian Mutations; GLO: Global (1000 Genomes). Bold exons are contained in common  
414 isoforms.

415 **S2 Table. Chromosome position, reference (RS) and minor allele of SNPs (MAF>0.01) in**  
416 **ten thousand base pairs 5' upstream of ACE2.** \*Insertion of an Alu mobile element relative to the  
417 reference

418 **S3 Table. ACE2 polymorphisms with the potential to influence COVID-19 and their**  
419 **population and sex differences.** Population\*: Population with greater MAF; RS: Reference SNP; Site:  
420 genic region; MAF\*: minor allele frequency of population\*; Subpopulation alert (MAF): Subpopulation  
421 with greater MAF; Others (MAF): MAF of the other populations (or populations without MAF=null);  
422 Modification (score): Type of molecular consequence and PolyPhen Score<sup>23</sup>; Hypothetical influence:  
423 based on hypothetical biological influence in disease; Men risk: based on hemizygous genotypic  
424 frequency (q); Women risk: based on homozygous genotypic frequency (q<sup>2</sup>); M/W: risk ratio between  
425 sexes to be a carrier of the minor allele only.

426 **S4 Table. Tribe names and geographic coordinates of the Brazilian Amazon indigenous**  
427 **populations enrolled in this study.**
